# Supplementary material
Source: publisher figshare collection journal article supplement (https://diabetesjournals.figshare.com/articles/dataset/_/13228649)
Supplement: Supplementary file 2 [file 1]

### **Online-Only Supplementary Materials**

1. Supplementary materials for bile acids measurement.
2. Supplementary materials for statistic.
3. Supplementary Figure 1. Schematic diagram illustrates the study design adopted.
4. Supplementary Table 1. Association between quartile of serum bile acids and incident diabetes (Odds ratio, 95% confidence interval).
5. Supplementary Table 2. Association between bile acid per SD increment and risk of incident diabetes with further adjustment of HbA1c.
6. Supplementary Table 3. Baseline characteristics of the nested case and control in Ad-hoc Analysis.
7. Supplementary Table 4. Association between bile acid per SD increment and risk of incident diabetes in Ad-hoc Analysis.
8. Supplementary Table 5. Characteristics of studies investigating associations of bile acids and risk of type 2 diabetes.

## **1. Supplementary materials for bile acids measurement**

Serum samples collected at baseline were analyzed for BAs using the UPLC-MS/MS with multiple reactions monitoring methods in an ACQUITY UPLC system (Waters, USA) coupled to a triple quadrupole mass spectrometer (Waters, USA). For liquid chromatography separation, an UPLC BEH C8 column (100 mm×2.1 mm i.d.; 1.7 µm; Waters, USA) was used at 40 °C and a flow rate of 0.2 mL/min. The mobile phases were 10mM ammonium bicarbonate solution (A) and 100% acetonitrile (B). The gradient elution was set at 25% (v/v) B for 0.5 min, linearly increased to 40% B during the next 12.5 min, linearly increased to 90% B during the next 1 min, linearly decreased to 25% B during the next 0.5 min, and finally maintained at this composition for an additional 2.5 min. The injection volume was 5 µl. The mass spectrometer was used in electrospray ionization (ESI) negative mode.

## **2. Supplementary Materials for statistic**

### **2.1 Ad hoc analysis**

Although we did age, sex, BMI, and FPG propensity score matching for case and control groups, there are however notable metabolic differences between the groups. To better match the case and control, we carried out an ad-hoc analysis on those matched for these parameters as well. Frequency matching is a sampling design used in case–control studies to assure that cases and controls have the same distributions over strata defined by matching factors. First, we did frequency match of the two groups on these factors, including SBP, 2hr glucose, cholesterol, triglycerides, liver enzymes and HOMA-IR. The final dataset showed no significant differences in these factors between the two groups in 1326 pairs of cases and controls (Supplementary Table 3). We next conducted further analyses regarding the odds ratio of incident diabetes associated with serum BAs (Supplementary Table 4).

### **2.2 Multiscale embedded correlation network analysis using MEGENA**

R package MEGENA was used to build correlation network from differentially correlated BA pairs. Differential correlation was calculated using R package DGCA. Only BA pairs with differential correlation ( $P < 0.05$ ) were included for analyses. Colored lines represent the direction and strength of the correlation in incident diabetes and controls, and the number of lines that follows indicates the number of BA pairs in the global networks exhibiting this pattern of change. For instance, 1) the pink line ++/0/ 13 in the second column under the network indicates that correlation between two connected BA pairs was unrelated (0) in controls, and they became

positively correlated (++) in incident diabetes. A total of 13 BA pairs connected by pink lines in the network displayed this pattern of change. 2) the dark blue line +/++/ 3 in the third column under the network indicates that correlation between two connected BA pairs was (++) in controls, and the correlation became weaker (+) in incident diabetes. A total of 3 BA pairs connected by dark blue lines in the network displayed this pattern of change. +  $P < 0.05$ , ++  $P < 0.01$ , both are positive correlated. –  $P < 0.05$ , --  $P < 0.01$ , both are negative correlated. 0  $P > 0.05$ .

**Supplementary Figure 1. Schematic diagram illustrates the study design adopted.**

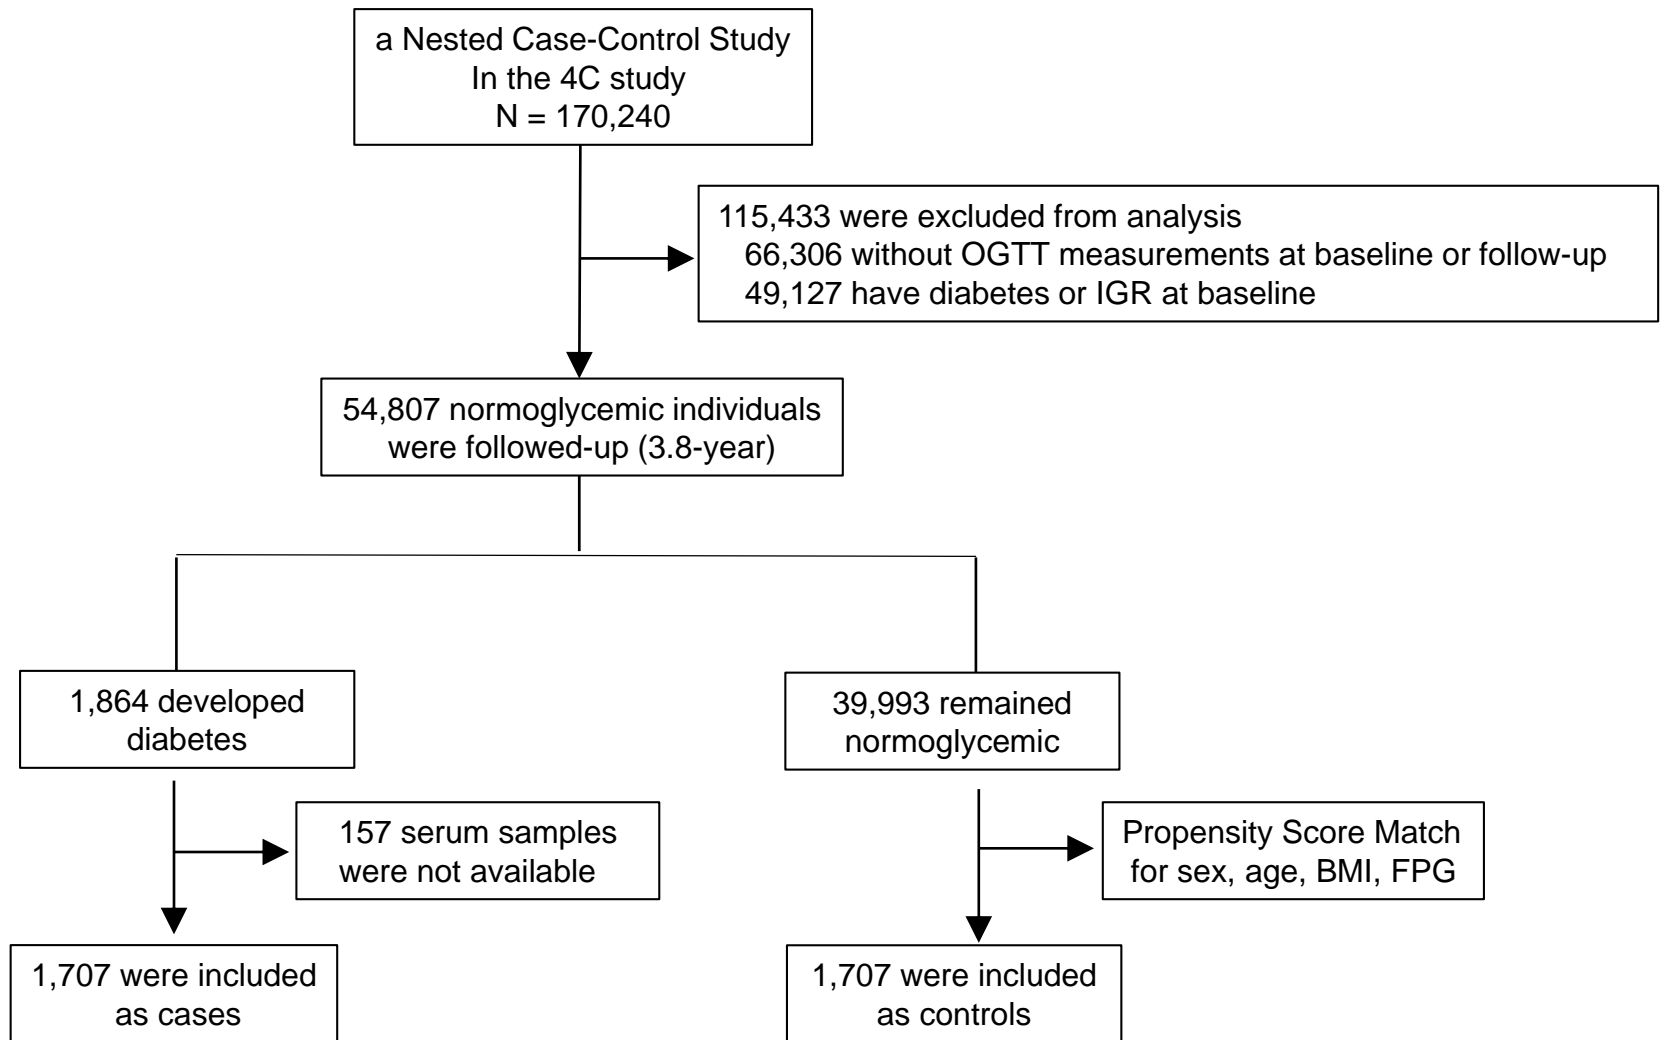

| Supplementary Table 1. Association between serum bile acids and incident diabetes (Odds ratio, 95% confidence interval) |                  |                         |                         |                          |                   |
|-------------------------------------------------------------------------------------------------------------------------|------------------|-------------------------|-------------------------|--------------------------|-------------------|
|                                                                                                                         | Quartiles of BAs |                         |                         |                          |                   |
|                                                                                                                         | Q1               | Q2                      | Q3                      | Q4                       | <i>P</i> trend    |
| Multi-variable adjusted model*                                                                                          |                  |                         |                         |                          |                   |
| Primary Unconjugated BA                                                                                                 |                  |                         |                         |                          |                   |
| CA                                                                                                                      | 1.00 (ref)       | 0.95 (0.78-1.16)        | 0.87 (0.72-1.06)        | <b>0.74 (0.60-0.90)</b>  | <b>0.0024</b>     |
| CDCA                                                                                                                    | 1.00 (ref)       | 0.82 (0.67-1.003)       | 0.90 (0.74-1.10)        | <b>0.76 (0.62- 0.93)</b> | <b>0.0216</b>     |
| Primary Conjugated BA                                                                                                   |                  |                         |                         |                          |                   |
| GCA                                                                                                                     | 1.00 (ref)       | 1.21 (0.99-1.49)        | 1.11 (0.90-1.36)        | <b>1.50 (1.23-1.84)</b>  | <b>0.0004</b>     |
| GCDCA                                                                                                                   | 1.00 (ref)       | 0.97 (0.79-1.19)        | 1.09 (0.89-1.34)        | <b>1.34 (1.09-1.64)</b>  | <b>0.0018</b>     |
| TCA                                                                                                                     | 1.00 (ref)       | 1.22 (0.995-1.53)       | <b>1.32 (1.07-1.62)</b> | <b>1.61 (1.31-1.97)</b>  | <b>&lt;0.0001</b> |
| TCDCA                                                                                                                   | 1.00 (ref)       | 1.15 (0.94-1.41)        | 1.27 (1.04-1.56)        | <b>1.51 (1.23-1.84)</b>  | <b>&lt;0.0001</b> |
| GDCS                                                                                                                    | 1.00 (ref)       | 1.18 (0.96-1.44)        | 1.08 (0.88-1.33)        | <b>1.35 (1.10-1.67)</b>  | <b>0.0132</b>     |
| TCDCS                                                                                                                   | 1.00 (ref)       | 0.98 (0.80-1.20)        | 1.03 (0.85-1.26)        | 1.18 (0.96-1.44)         | 0.0943            |
| GCDCA-glucuronide                                                                                                       | 1.00 (ref)       | 1.04 (0.85-1.28)        | 1.17 (0.95-1.44)        | 1.16 (0.94-1.43)         | 0.1117            |
| Secondary Unconjugated BA                                                                                               |                  |                         |                         |                          |                   |
| DCA                                                                                                                     | 1.00 (ref)       | 0.88 (0.73-1.07)        | 0.82(0.67-0.996)        | 0.83 (0.68-1.01)         | <b>0.0411</b>     |
| LCA                                                                                                                     | 1.00 (ref)       | 0.96 (0.78-1.17)        | 0.96 (0.78-1.17)        | 1.01 (0.83-1.24)         | 0.8843            |
| UDCA                                                                                                                    | 1.00 (ref)       | 0.93 (0.76-1.14)        | 0.79 (0.65-0.97)        | 0.90 (0.74-1.09)         | 0.1275            |
| Secondary Conjugated BA                                                                                                 |                  |                         |                         |                          |                   |
| GDCS                                                                                                                    | 1.00 (ref)       | 0.91 (0.75-1.11)        | 0.92 (0.75-1.12)        | 1.01 (0.83-1.23)         | 0.9474            |
| TDCS                                                                                                                    | 1.00 (ref)       | 0.89 (0.73-1.09)        | 0.95 (0.78-1.16)        | 1.03 (0.84-1.26)         | 0.6428            |
| GDCA                                                                                                                    | 1.00 (ref)       | 0.81 (0.66-0.99)        | 0.98 (0.81-1.20)        | 0.96 (0.79-1.17)         | 0.8550            |
| GDCA-glucuronide                                                                                                        | 1.00 (ref)       | 1.05 (0.86-1.27)        | 0.94 (0.77-1.15)        | 0.97 (0.79-1.19)         | 0.5426            |
| GLCA                                                                                                                    | 1.00 (ref)       | 0.76 (0.62-0.92)        | 0.82 (0.67-1.001)       | 0.92 (0.76-1.12)         | 0.6582            |
| GLCAS                                                                                                                   | 1.00 (ref)       | 0.86 (0.70-1.05)        | 0.86 (0.70-1.06)        | 1.05 (0.86-1.29)         | 0.6358            |
| GUDCA                                                                                                                   | 1.00 (ref)       | 0.98 (0.80-1.20)        | 1.01 (0.82-1.23)        | 1.13 (0.92-1.38)         | 0.2186            |
| TDCA                                                                                                                    | 1.00 (ref)       | 0.94 (0.77-1.15)        | 0.97 (0.79-1.19)        | 1.17 (0.96-1.43)         | 0.0896            |
| TLCA                                                                                                                    | 1.00 (ref)       | 0.77 (0.62-0.94)        | 1.01 (0.82-1.23)        | 1.11 (0.91-1.36)         | 0.0660            |
| TLCAS                                                                                                                   | 1.00 (ref)       | 0.90 (0.74-1.10)        | 0.88 (0.72-1.08)        | 1.06 (0.86-1.30)         | 0.6526            |
| TUDCA                                                                                                                   | 1.00 (ref)       | 1.19 (0.98-1.45)        | 1.06 (0.86-1.31)        | <b>1.44 (1.18-1.77)</b>  | <b>0.0016</b>     |
| Ratio                                                                                                                   |                  |                         |                         |                          |                   |
| TCA/CA                                                                                                                  | 1.00 (ref)       | 0.94 (0.77-1.15)        | <b>1.32 (1.08-1.61)</b> | <b>1.57 (1.28-1.91)</b>  | <b>&lt;0.0001</b> |
| GCA/CA                                                                                                                  | 1.00 (ref)       | 1.09 (0.89-1.34)        | <b>1.44 (1.18-1.76)</b> | <b>1.60 (1.31-1.96)</b>  | <b>&lt;0.0001</b> |
| TCDCA/CDCA                                                                                                              | 1.00 (ref)       | <b>1.28 (1.04-1.57)</b> | <b>1.38 (1.12-1.70)</b> | <b>1.73 (1.41-2.12)</b>  | <b>&lt;0.0001</b> |
| GCDCA/CDCA                                                                                                              | 1.00 (ref)       | 1.09 (0.89-1.33)        | <b>1.34 (1.10-1.65)</b> | <b>1.51 (1.24-1. 85)</b> | <b>&lt;0.0001</b> |
| 12 $\alpha$ OH/non12 $\alpha$ OH BA                                                                                     | 1.00 (ref)       | 1.08(0.89 -1.31)        | 0.97 (0.80-1.18)        | 0.93 (0.77 -1.13)        | 0.3198            |
| Fully adjusted model †                                                                                                  |                  |                         |                         |                          |                   |
| Primary Unconjugated BA                                                                                                 |                  |                         |                         |                          |                   |
| CA                                                                                                                      | 1.00 (ref)       | 1.06 (0.85-1.33)        | 0.89 (0.71-1.11)        | 0.82 (0.65-1.04)         | <b>0.0392</b>     |
| CDCA                                                                                                                    | 1.00 (ref)       | 0.85 (0.68-1.07)        | 0.91 (0.73-1.14)        | 0.80 (0.64-1.004)        | 0.0952            |
| Primary Conjugated BA                                                                                                   |                  |                         |                         |                          |                   |
| GCA                                                                                                                     | 1.00 (ref)       | 1.25 (0.99-1.59)        | 1.05 (0.83-1.33)        | <b>1.38 (1.09-1.73)</b>  | <b>0.0276</b>     |

|                                                                                                                                                                                                                                                                                                                   |            |                          |                         |                         |               |
|-------------------------------------------------------------------------------------------------------------------------------------------------------------------------------------------------------------------------------------------------------------------------------------------------------------------|------------|--------------------------|-------------------------|-------------------------|---------------|
| GCDCA                                                                                                                                                                                                                                                                                                             | 1.00 (ref) | 1.02 (0.81-1.29)         | 1.07 (0.85-1.35)        | 1.23 (0.98-1.55)        | 0.0636        |
| TCA                                                                                                                                                                                                                                                                                                               | 1.00 (ref) | 1.21 (0.96-1.53)         | <b>1.31 (1.04-1.66)</b> | <b>1.41 (1.12-1.79)</b> | <b>0.0037</b> |
| TCDCA                                                                                                                                                                                                                                                                                                             | 1.00 (ref) | 1.19 (0.94-1.49)         | 1.26 (0.99-1.60)        | <b>1.33 (1.06-1.68)</b> | <b>0.0160</b> |
| GDCS                                                                                                                                                                                                                                                                                                              | 1.00 (ref) | 1.10 (0.87-1.38)         | 1.00 (0.79-1.27)        | 1.27 (0.995-1.61)       | 0.1058        |
| TCDCS                                                                                                                                                                                                                                                                                                             | 1.00 (ref) | 0.93 (0.74-1.17)         | 1.04 (0.83-1.30)        | 1.11 (0.88-1.41)        | 0.2439        |
| GCDCA-glucuronide                                                                                                                                                                                                                                                                                                 | 1.00 (ref) | 1.06 (0.84-1.34)         | 1.12 (0.89-1.42)        | 1.07 (0.84-1.37)        | 0.5073        |
| <b>Secondary Unconjugated BA</b>                                                                                                                                                                                                                                                                                  |            |                          |                         |                         |               |
| DCA                                                                                                                                                                                                                                                                                                               | 1.00 (ref) | 1.04 (0.83-1.30)         | 0.91 (0.73-1.14)        | 0.87 (0.70-1.10)        | 0.1520        |
| LCA                                                                                                                                                                                                                                                                                                               | 1.00 (ref) | 0.89 (0.71-1.12)         | 0.94 (0.75-1.18)        | 0.99 (0.79-1.24)        | 0.9775        |
| UDCA                                                                                                                                                                                                                                                                                                              | 1.00 (ref) | 0.92 (0.74-1.15)         | 0.81 (0.64-1.01)        | 0.90 (0.72-1.12)        | 0.2072        |
| <b>Secondary Conjugated BA</b>                                                                                                                                                                                                                                                                                    |            |                          |                         |                         |               |
| GDCS                                                                                                                                                                                                                                                                                                              | 1.00 (ref) | 0.90 (0.72-1.13)         | 0.96 (0.77-1.20)        | 1.00 (0.80-1.25)        | 0.8717        |
| TDCS                                                                                                                                                                                                                                                                                                              | 1.00 (ref) | 0.91 (0.72-1.14)         | 0.98 (0.78-1.22)        | 0.97 (0.78-1.22)        | 0.9790        |
| GDCA                                                                                                                                                                                                                                                                                                              | 1.00 (ref) | 0.85 (0.68-1.07)         | 1.03 (0.82-1.29)        | 0.95 (0.76-1.19)        | 0.9554        |
| GDCA-glucuronide                                                                                                                                                                                                                                                                                                  | 1.00 (ref) | 1.09 (0.88-1.36)         | 0.99 (0.79-1.24)        | 0.91 (0.72-1.14)        | 0.2977        |
| GLCA                                                                                                                                                                                                                                                                                                              | 1.00 (ref) | 0.86 (0.69-1.08)         | 0.90 (0.71-1.13)        | 0.98 (0.78-1.21)        | 0.9461        |
| GLCAS                                                                                                                                                                                                                                                                                                             | 1.00 (ref) | 0.92 (0.74-1.16)         | 0.94 (0.75-1.19)        | 1.11 (0.88-1.40)        | 0.3881        |
| GUDCA                                                                                                                                                                                                                                                                                                             | 1.00 (ref) | 1.12 (0.89-1.40)         | 1.05 (0.84-1.32)        | 1.11 (0.88-1.39)        | 0.5078        |
| TDCA                                                                                                                                                                                                                                                                                                              | 1.00 (ref) | 0.97 (0.78-1.22)         | 0.99 (0.79-1.25)        | 1.09 (0.88-1.37)        | 0.3936        |
| TLCA                                                                                                                                                                                                                                                                                                              | 1.00 (ref) | <b>0.78 (0.62-0.98)</b>  | 1.00 (0.80-1.25)        | 1.08 (0.86-1.35)        | 0.1997        |
| TLCAS                                                                                                                                                                                                                                                                                                             | 1.00 (ref) | 1.02 (0.81-1.28)         | 0.87 (0.69-1.10)        | 1.09 (0.87-1.36)        | 0.7658        |
| TUDCA                                                                                                                                                                                                                                                                                                             | 1.00 (ref) | <b>1.26 (1.001-1.58)</b> | 1.08 (0.85-1.37)        | <b>1.34 (1.07-1.69)</b> | <b>0.0450</b> |
| <b>Ratio</b>                                                                                                                                                                                                                                                                                                      |            |                          |                         |                         |               |
| TCA/CA                                                                                                                                                                                                                                                                                                            | 1.00 (ref) | 0.91 (0.72-1.14)         | 1.18 (0.94-1.48)        | <b>1.41 (1.12-1.77)</b> | <b>0.0005</b> |
| GCA/CA                                                                                                                                                                                                                                                                                                            | 1.00 (ref) | 1.08 (0.85-1.36)         | <b>1.35 (1.08-1.70)</b> | <b>1.43 (1.14-1.80)</b> | <b>0.0005</b> |
| TCDCA/CDCA                                                                                                                                                                                                                                                                                                        | 1.00 (ref) | 1.21 (0.96-1.53)         | <b>1.38 (1.09-1.74)</b> | <b>1.53 (1.21-1.93)</b> | <b>0.0003</b> |
| GCDCA/CDCA                                                                                                                                                                                                                                                                                                        | 1.00 (ref) | 1.00 (0.79-1.25)         | <b>1.17 (0.93-1.47)</b> | <b>1.40 (1.11-1.75)</b> | <b>0.0012</b> |
| 12 $\alpha$ OH/non12 $\alpha$ OH BA                                                                                                                                                                                                                                                                               | 1.00 (ref) | 0.94 (0.76-1.18)         | 0.90 (0.71-1.13)        | 0.89 (0.71-1.12)        | 0.2917        |
| *Adjusted for age, sex, BMI, smoking status, alcohol intake, physical activity, education status, diabetes family history, SBP, fasting blood glucose, triglycerides and total cholesterol; †Adjustment of multivariable-adjusted model plus diet pattern, HDL, ALT, AST, 2h-PG, HOMA-IR and waist circumference. |            |                          |                         |                         |               |

Supplementary Table 2. Association between bile acid per SD increment and risk of incident diabetes (n=3414).

|                                  | OR (95%CI)               | P value         |
|----------------------------------|--------------------------|-----------------|
| <b>Primary Unconjugated BA</b>   |                          |                 |
| CA                               | 0.94 (0.87-1.02)         | 0.1589          |
| CDCA                             | 0.94 (0.86-1.02)         | 0.1316          |
| <b>Primary Conjugated BA</b>     |                          |                 |
| GCA                              | <b>1.16 (1.06-1.27)</b>  | <b>0.0012**</b> |
| GCDCA                            | <b>1.13 (1.04-1.24)</b>  | <b>0.0062*</b>  |
| TCA                              | <b>1.16 (1.07-1.27)</b>  | <b>0.0006**</b> |
| TCDCA                            | <b>1.17 (1.07-1.27)</b>  | <b>0.0006**</b> |
| GDCS                             | 1.12 (1.02-1.23)         | 0.0161          |
| TCDCS                            | 1.05 (0.96-1.15)         | 0.2675          |
| GCDCA-glucuronide                | 1.06 (0.97-1.16)         | 0.2000          |
| <b>Secondary Unconjugated BA</b> |                          |                 |
| DCA                              | <b>0.89 (0.82-0.97)</b>  | <b>0.0106*</b>  |
| LCA                              | 1.02 (0.94-1.12)         | 0.6122          |
| UDCA                             | 1.00 (0.92-1.09)         | 0.9537          |
| <b>Secondary Conjugated BA</b>   |                          |                 |
| GDCS                             | 0.98 (0.90-1.07)         | 0.6435          |
| TDCS                             | 0.97 (0.89-1.06)         | 0.5556          |
| GDCA                             | 0.98 (0.90-1.07)         | 0.6344          |
| GDCA-glucuronide                 | 0.96 (0.88-1.04)         | 0.3128          |
| GLCA                             | 0.99 (0.91-1.08)         | 0.7954          |
| GLCAS                            | 0.99 (0.91-1.08)         | 0.8410          |
| GUDCA                            | <b>1.09 (1.003-1.19)</b> | <b>0.0418</b>   |
| TDCA                             | 1.02 (0.94-1.11)         | 0.5864          |
| TLCA                             | 1.05 (0.96-1.14)         | 0.3115          |
| TLCAS                            | 0.98 (0.90-1.07)         | 0.6371          |
| TUDCA                            | <b>1.14 (1.05-1.25)</b>  | <b>0.0026*</b>  |
| <b>Subgroup</b>                  |                          |                 |
| Total BAs                        | 1.08 (0.99-1.18)         | 0.0786          |
| Total primary BAs                | 1.08 (0.99-1.18)         | 0.0741          |
| Total primary unconjugated BAs   | 0.94 (0.86-1.02)         | 0.1231          |
| Total primary conjugated BAs     | <b>1.15 (1.05-1.26)</b>  | <b>0.0021*</b>  |
| Total secondary BAs              | 1.01 (0.92-1.10)         | 0.8778          |
| Total secondary unconjugated BAs | 0.95 (0.87-1.03)         | 0.2233          |
| Total secondary conjugated BAs   | 1.05 (0.97-1.14)         | 0.2571          |
| Total taurine-conjugated BAs     | <b>1.14 (1.04-1.24)</b>  | <b>0.0041*</b>  |
| Total glycine-conjugated BAs     | <b>1.14 (1.05-1.25)</b>  | <b>0.0026*</b>  |
| 12 $\alpha$ OH BAs               | 1.03 (0.95-1.13)         | 0.4509          |
| HI                               | 0.98 (0.88-1.11)         | 0.7829          |
| <b>Ratio</b>                     |                          |                 |

|                                                                                                                                                                                                                                                                                   |                         |                 |
|-----------------------------------------------------------------------------------------------------------------------------------------------------------------------------------------------------------------------------------------------------------------------------------|-------------------------|-----------------|
| TCA/CA                                                                                                                                                                                                                                                                            | 1.09 (0.99-1.20)        | 0.0753          |
| GCA/CA                                                                                                                                                                                                                                                                            | 1.06 (0.97-1.15)        | 0.2249          |
| TCDCA/CDCA                                                                                                                                                                                                                                                                        | <b>1.18 (1.08-1.28)</b> | <b>0.0002**</b> |
| GCDCA/CDCA                                                                                                                                                                                                                                                                        | <b>1.14 (1.05-1.24)</b> | <b>0.0017*</b>  |
| 12 $\alpha$ OH/non12 $\alpha$ OH BA                                                                                                                                                                                                                                               | 0.97 (0.89-1.06)        | 0.4547          |
| Adjusted for age, sex, BMI, smoking status, alcohol intake, physical activity, diet, education status, diabetes family history, SBP, fasting blood glucose, triglycerides, total cholesterol, HDL, ALT, AST, 2h-PG, HOMA-IR, HbA1c and waist circumference. *FDR<0.05, **FDR<0.01 |                         |                 |



| Supplementary Table 3. Baseline Characteristics of the Nested Case and Control in Ad-hoc Analysis                                                                                              |                  |                  |          |
|------------------------------------------------------------------------------------------------------------------------------------------------------------------------------------------------|------------------|------------------|----------|
|                                                                                                                                                                                                | Case             | Control          | <i>P</i> |
| N                                                                                                                                                                                              | 1326             | 1326             |          |
| Age, years                                                                                                                                                                                     | 57.59±8.89       | 57.69±8.69       | 0.7820   |
| Male, n (%)                                                                                                                                                                                    | 528 (39.8)       | 515 (38.8)       | 0.6053   |
| Body Mass Index, kg/m <sup>2</sup>                                                                                                                                                             | 24.73±3.65       | 24.80±3.50       | 0.6557   |
| Waist circumference                                                                                                                                                                            | 84.33±10.13      | 84.08±9.91       | 0.5045   |
| High school or above education, n (%)                                                                                                                                                          | 372 (28.1)       | 370 (27.9)       | 0.9311   |
| Moderate and vigorous physical activity, n (%)                                                                                                                                                 | 188 (14.2)       | 166 (12.5)       | 0.2091   |
| Healthy diet, n (%)                                                                                                                                                                            | 610 (46.0)       | 561 (42.3)       | 0.0553   |
| Family history of diabetes, n (%)                                                                                                                                                              | 152 (11.5)       | 94 (7.1)         | 0.0001   |
| Current smoker, n (%)                                                                                                                                                                          | 228 (17.2)       | 243 (18.3)       | 0.4460   |
| Current drinker, n (%)                                                                                                                                                                         | 146 (11.0)       | 162 (12.2)       | 0.3322   |
| Systolic Blood Pressure, mmHg                                                                                                                                                                  | 135.09±20.32     | 134.06±20.06     | 0.1890   |
| Fasting plasma glucose, mmol/L                                                                                                                                                                 | 5.46 (5.15-5.74) | 5.44 (5.16-5.70) | 0.5063   |
| 2h-plasma glucose, mmol/L                                                                                                                                                                      | 6.40 (5.53-7.10) | 6.27 (5.48-6.97) | 0.0840   |
| Fasting triglycerides, mmol/L                                                                                                                                                                  | 1.27 (0.91-1.76) | 1.24 (0.90-1.68) | 0.2662   |
| Fasting HDL cholesterol, mmol/L                                                                                                                                                                | 1.33±0.36        | 1.35±0.35        | 0.0653   |
| Fasting LDL cholesterol, mmol/L                                                                                                                                                                | 2.86±0.86        | 2.88±0.81        | 0.4418   |
| Fasting cholesterol, mmol/L                                                                                                                                                                    | 4.89±1.10        | 4.93±1.04        | 0.3459   |
| AST, IU/L                                                                                                                                                                                      | 21.36±8.06       | 21.44±7.87       | 0.8122   |
| ALT, IU/L                                                                                                                                                                                      | 16.38±8.54       | 15.73±8.04       | 0.0511   |
| HOMA-IR                                                                                                                                                                                        | 1.56 (1.07-2.30) | 1.55 (1.13-2.12) | 0.8714   |
| Values are number (percent), mean ± standard deviation, or median (inter-quartile range). AST, aspartate aminotransferase; ALT, alanine aminotransferase; HOMA-IR, HOMA of insulin resistance. |                  |                  |          |

Supplementary Table 4. Association between bile acid per SD increment and risk of incident diabetes (n=2652).

|                                  | OR (95% CI)             | P value        |
|----------------------------------|-------------------------|----------------|
| <b>Primary Unconjugated BA</b>   |                         |                |
| CA                               | <b>0.90 (0.83-0.98)</b> | <b>0.0127*</b> |
| CDCA                             | <b>0.91 (0.84-0.99)</b> | <b>0.0281</b>  |
| <b>Primary Conjugated BA</b>     |                         |                |
| GCA                              | <b>1.14 (1.05-1.24)</b> | <b>0.0029*</b> |
| GCDCA                            | <b>1.12 (1.03-1.22)</b> | <b>0.0080*</b> |
| TCA                              | <b>1.13 (1.04-1.23)</b> | <b>0.0038*</b> |
| TCDCA                            | <b>1.12 (1.03-1.22)</b> | <b>0.0061*</b> |
| GDCS                             | <b>1.11 (1.02-1.22)</b> | <b>0.0192</b>  |
| TCDCS                            | 1.03 (0.95-1.12)        | 0.4815         |
| GCDCA-glucuronide                | 1.03 (0.94-1.12)        | 0.5810         |
| <b>Secondary Unconjugated BA</b> |                         |                |
| DCA                              | <b>0.89 (0.82-0.97)</b> | <b>0.0071*</b> |
| LCA                              | 1.01 (0.93-1.10)        | 0.7594         |
| UDCA                             | 0.97 (0.89-1.05)        | 0.4476         |
| <b>Secondary Conjugated BA</b>   |                         |                |
| GDCS                             | 0.97 (0.90-1.06)        | 0.5034         |
| TDCS                             | 0.96 (0.88-1.04)        | 0.3354         |
| GDCA                             | 0.97 (0.89-1.05)        | 0.4532         |
| GDCA-glucuronide                 | 0.95 (0.87-1.03)        | 0.1822         |
| GLCA                             | 0.99 (0.91-1.07)        | 0.7727         |
| GLCAS                            | 0.98 (0.90-1.06)        | 0.6210         |
| GUDCA                            | 1.08 (0.99-1.17)        | 0.0861         |
| TDCA                             | 0.996 (0.92-1.08)       | 0.9224         |
| TLCA                             | 1.03 (0.95-1.12)        | 0.4493         |
| TLCAS                            | 0.97 (0.89-1.06)        | 0.4834         |
| TUDCA                            | <b>1.10 (1.01-1.19)</b> | <b>0.0248</b>  |
| <b>Subgroup</b>                  |                         |                |
| Total BAs                        | 1.04 (0.96-1.13)        | 0.3296         |
| Total PBAs                       | 1.05 (0.96-1.14)        | 0.3066         |
| Total primary unconjugated       | <b>0.90 (0.83-0.98)</b> | <b>0.0160</b>  |
| Total primary conjugated         | <b>1.13 (1.04-1.23)</b> | <b>0.0060*</b> |
| Total SBAs                       | 0.97 (0.89-1.05)        | 0.4252         |
| Total secondary unconjugated     | <b>0.91 (0.84-0.99)</b> | <b>0.0260</b>  |
| Total secondary conjugated       | 1.03 (0.95-1.11)        | 0.5504         |
| Total taurine-conjugated BAs     | <b>1.10 (1.01-1.20)</b> | <b>0.0221</b>  |
| Total glycine-conjugated BAs     | <b>1.12 (1.03-1.22)</b> | <b>0.0072*</b> |
| 12 $\alpha$ OH BAs               | 0.99 (0.91-1.08)        | 0.8619         |
| HI                               | 1.02 (0.92-1.13)        | 0.7246         |

| <b>Ratio</b>                        |                         |                 |
|-------------------------------------|-------------------------|-----------------|
| TCA/CA                              | 1.12 (0.999-1.25)       | 0.0519          |
| GCA/CA                              | 1.09 (0.97-1.24)        | 0.1463          |
| TCDCA/CDCA                          | <b>1.16 (1.07-1.26)</b> | <b>0.0004**</b> |
| GCDCA/CDCA                          | <b>1.17 (1.08-1.27)</b> | <b>0.0002**</b> |
| 12 $\alpha$ OH/non12 $\alpha$ OH BA | 0.95 (0.88-1.03)        | 0.2314          |

Adjusted for age, sex, BMI, smoking status, alcohol intake, physical activity, diet, education status, diabetes family history, SBP, fasting blood glucose, triglycerides, total cholesterol, HDL, ALT, AST, 2h-PG, HOMA-IR, and waist circumference.

Supplementary Table 5. Characteristics of studies investigating associations of bile acids and risk of type 2 diabetes

| Reference                                            | Study population                                                                          | Study design                                   | N, follow-up time                                                                                                                                         | Methods/ tested BAs                                                                                                                                                                                                   | Key findings                                                                                                                                                                                                                                                                |
|------------------------------------------------------|-------------------------------------------------------------------------------------------|------------------------------------------------|-----------------------------------------------------------------------------------------------------------------------------------------------------------|-----------------------------------------------------------------------------------------------------------------------------------------------------------------------------------------------------------------------|-----------------------------------------------------------------------------------------------------------------------------------------------------------------------------------------------------------------------------------------------------------------------------|
| Marlene Wewalka et al. 2014, J Clin Endocrinol Metab | Volunteers<br>U.S                                                                         | Cross-sectional                                | 62 NGR<br>25 IGT<br>12 T2DM                                                                                                                               | HPLC tandem mass spectrometry<br><br>Fasting and postload serum BAs, including CA, CDCA, DCA, UDCA, muricholic acid (MCA), and their respective taurine (T) and glycine (G) conjugates                                | Fasting taurine-conjugated BA are higher in T2DM, compared with NGR subjects.                                                                                                                                                                                               |
| Christoph Nowak et al. 2016, Plos Genetics           | ULSAM<br>Sweden                                                                           | Cohort,<br>population based<br>cross-sectional | 952 non-diabetes                                                                                                                                          | Untargeted plasma metabolomics by liquid chromatography/mass spectrometry (LC/MS)<br><br>3 $\alpha$ ,6 $\beta$ ,7 $\beta$ -trihydroxy-5 $\beta$ -cholanoic acid, CDCA, GCDCA, CA, DCA, GCDCA, DCA-related metabolites | Positively associated with IR: deoxycholic acid-glycine conjugate, GDCA, GCA;<br>Negatively associated with IR: 3 $\alpha$ ,6 $\beta$ ,7 $\beta$ -trihydroxy-5 $\beta$ -cholanoic acid, 3 $\alpha$ ,6 $\beta$ ,7 $\beta$ -trihydroxy-5 $\beta$ -cholanoic acid-related, CA; |
| Tove Fall et al. 2016, Diabetologia                  | ULSAM, Swedish;<br>PIVUS, Swedish;<br>TwinGene, Swedish;<br>KORA S4, German.              | Cohort,<br>prospective,<br>population based    | ULSAM: 1060 non-DM/78 T2DM, 21 yrs;<br>PIVUS: 900 non-DM/70 T2DM, 5 yrs;<br>TwinGene: 1508 non-DM/122 T2DM, 6 yrs;<br>KORA S4: 767 non-DM/88 T2DM, 7 yrs. | Untargeted plasma metabolomics by LC/MS<br><br>5,961 metabolic features                                                                                                                                               | Associated with high risk of prevalent DM: deoxycholic acid glycine conjugate, GCA, DCA and GCDCA.                                                                                                                                                                          |
| Vanessa D. de Mello et al. 2017, Scientific Reports  | DPS<br>Finland                                                                            | Nested case-control                            | 96 T2D, 5 yrs/104 non-DM, 15 yrs                                                                                                                          | Untargeted plasma metabolomics by LC/MS<br>8,607 metabolic features                                                                                                                                                   | Increased risk with DM: GCA, TCDCA, GCDCA, GDCA, DCA, CA                                                                                                                                                                                                                    |
| Rebecca A. Haeusler et al. 2013 Diabetes             | Nondiabetes: RISC study; USA;<br>Diabetes:recruited from Clinical Research Center; Italy. | Cross-sectional                                | 200 non-DM/35 T2DM                                                                                                                                        | Targeted plasma metabolomics by LC/MS<br><br>CDCA, GCDCA, TCDCA, UDCA, HDCA, LCA, TLCA, CA, GCA, CA, DCA, GDCA, TDCA                                                                                                  | In healthy subjects, insulin resistance was associated with increased 12 $\alpha$ -hydroxylated BAs                                                                                                                                                                         |
